# Supplementary material for: Muscle ultrasound for early assessment of critical illness neuromyopathy in severe sepsis
Source: PubMed Central journal article supplement (PMC4057413; doi:10.1186/cc13050), 2013-10-07
Supplement: cc13050-S1.pdf [file cc13050-S1.pdf]

CMAP amplitudes mV

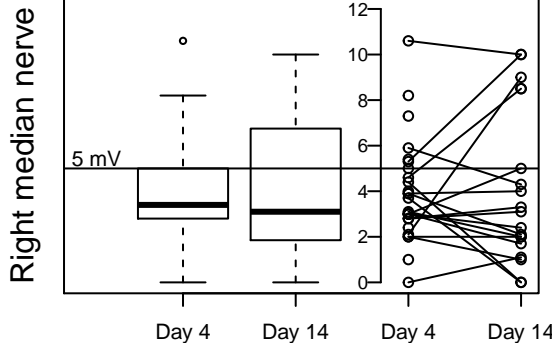

Conduction velocity m/s

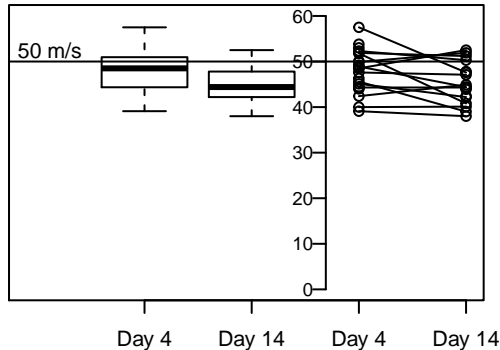

CMAP amplitudes mV

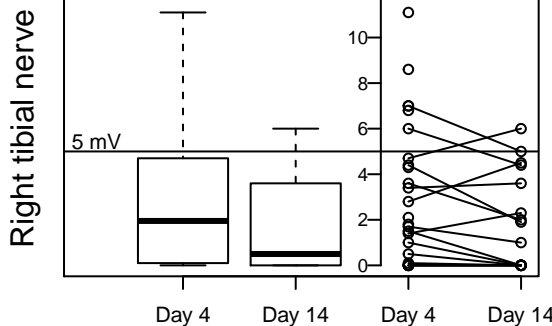

Conduction velocity m/s

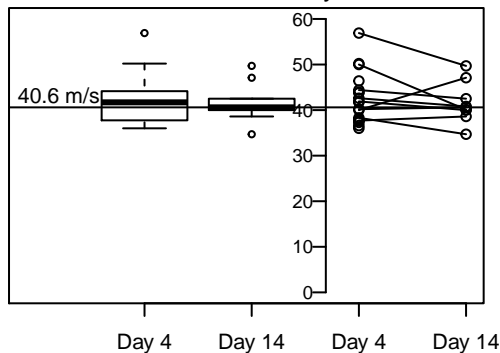

SNAP amplitude  $\mu\text{V}$

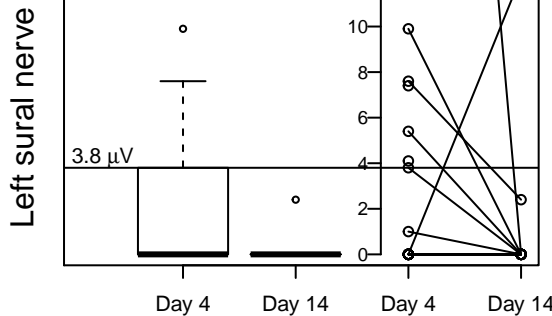

Conduction velocity m/s

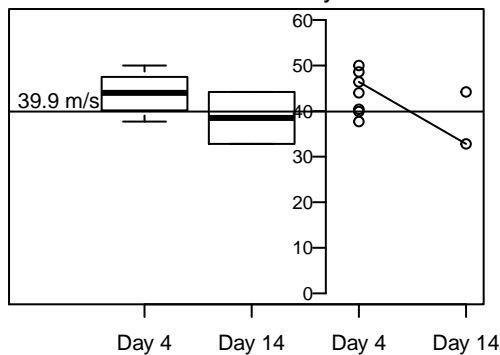

**Appendix Figure** Boxplots (left) and parallel coordinate plots (right) of nerve conduction measurements of patients. Each patient is represented by a grey circle and measurements of the same patient over time are connected with a line. Local reference values (lower limit of normal) are given by the reference axis. The figure only shows the results of 2 motor (CMAP=compound motor action potential) and 1 sensible nerves (SNAP = sensory nerve action potential) as typical examples. The measurements of the other nerves studied did not show divergent results.
